# Supplementary material for: Complete Chloroplast Genome of Cnidium monnieri (Apiaceae) and Comparisons with Other Tribe Selineae Species
Source: MDPI journal article supplement (doi:10.3390/d14050323), 2022-04-21
Supplement: s1 [file s1]

Table S1: Gene composition in the *C. monnieri* chloroplast genome.

Table S2: The repeat sequences and simple sequence repeats (SSRs) in the *C. monnieri* chloroplast genome.

Table S3: Codon usage and relative synonymous codon usage (RSCU) value for protein-coding genes in the *C. monnieri* chloroplast genome.

Table S4: RNA editing sites in the *C. monnieri* chloroplast genome.

Table S5: The rates of Ka, Ks, and Ka/Ks of 79 protein-coding genes among 13 tribe Selineae species.

Table S6: Species included in the phylogenetic analyses with their accession numbers.
