# Supplementary material for: Complete Chloroplast Genome of Cnidium monnieri (Apiaceae) and Comparisons with Other Tribe Selineae Species
Source: MDPI journal article supplement (doi:10.3390/d14050323), 2022-04-21
Supplement: s1 [file s1]

**Table S4.** RNA editing sites in the *C. monnieri* chloroplast genome.

| Gene            | Nt Pos | AA Pos | Align Col | Effect             | Score |
|-----------------|--------|--------|-----------|--------------------|-------|
| accD (C = 0.8)  | 74     | 25     | 26        | ACG (T) => ATG (M) | 1     |
|                 | 154    | 52     | 53        | CGG (R) => TGG (W) | 1     |
|                 | 785    | 262    | 288       | TCG (S) => TTG (L) | 0.8   |
|                 | 1186   | 396    | 434       | CCA (P) => TCA (S) | 1     |
|                 | 1394   | 465    | 503       | CCT (P) => CTT (L) | 1     |
| atpA (C = 0.8)  | 791    | 264    | 264       | CCC (P) => CTC (L) | 1     |
| atpB (C = 0.8)  | 35     | 12     | 12        | GCT (A) => GTT (V) | 0.86  |
|                 | 1487   | 496    | 496       | TCG (S) => TTG (L) | 1     |
| ccsA (C = 0.8)  | 556    | 186    | 191       | CTT (L) => TTT (F) | 0.8   |
| matK (C = 0.8)  | 640    | 214    | 229       | CAT (H) => TAT (Y) | 1     |
|                 | 991    | 331    | 346       | CTT (L) => TTT (F) | 0.86  |
|                 | 1013   | 338    | 353       | GCG (A) => GTG (V) | 0.86  |
| ndhA (C = 0.8)  | 107    | 36     | 36        | CCT (P) => CTT (L) | 1     |
|                 | 320    | 107    | 107       | ACA (T) => ATA (I) | 1     |
|                 | 566    | 189    | 189       | TCA (S) => TTA (L) | 1     |
|                 | 1073   | 358    | 358       | TCC (S) => TTC (F) | 1     |
| ndhB (C = 0.8)  | 149    | 50     | 50        | TCA (S) => TTA (L) | 1     |
|                 | 467    | 156    | 156       | CCA (P) => CTA (L) | 1     |
|                 | 586    | 196    | 196       | CAT (H) => TAT (Y) | 1     |
|                 | 611    | 204    | 204       | TCA (S) => TTA (L) | 0.8   |
|                 | 737    | 246    | 246       | CCA (P) => CTA (L) | 1     |
|                 | 746    | 249    | 249       | TCT (S) => TTT (F) | 1     |
|                 | 830    | 277    | 277       | TCA (S) => TTA (L) | 1     |
|                 | 836    | 279    | 279       | TCA (S) => TTA (L) | 1     |
|                 | 902    | 301    | 301       | ACC (T) => ATC (I) | 1     |
|                 | 1481   | 494    | 494       | CCA (P) => CTA (L) | 1     |
| ndhD (C = 0.8)  | 29     | 10     | 10        | ACG (T) => ATG (M) | 1     |
|                 | 701    | 234    | 234       | TCG (S) => TTG (L) | 1     |
|                 | 905    | 302    | 302       | TCA (S) => TTA (L) | 1     |
|                 | 1325   | 442    | 442       | TCA (S) => TTA (L) | 0.8   |
| ndhF (C = 0.8)  | 290    | 97     | 97        | TCA (S) => TTA (L) | 1     |
|                 | 2209   | 737    | 743       | CTT (L) => TTT (F) | 1     |
| ndhG (C = 0.8)  | 166    | 56     | 56        | CAT (H) => TAT (Y) | 0.8   |
|                 | 314    | 105    | 105       | ACA (T) => ATA (I) | 0.8   |
| petB (C = 0.8)  | 418    | 140    | 140       | CGG (R) => TGG (W) | 1     |
|                 | 611    | 204    | 204       | CCA (P) => CTA (L) | 1     |
| petG (C = 0.8)  | 104    | 35     | 35        | TCG (S) => TTG (L) | 1     |
| psaI (C = 0.8)  | 104    | 35     | 51        | ACT (T) => ATT (I) | 1     |
| psbF (C = 0.8)  | 77     | 26     | 26        | TCT (S) => TTT (F) | 1     |
| psbE (C = 0.8)  | 214    | 72     | 72        | CCT (P) => TCT (S) | 1     |
| rpl20 (C = 0.8) | 308    | 103    | 103       | TCA (S) => TTA (L) | 0.86  |
| rpoC2 (C = 0.8) | 842    | 281    | 292       | ACT (T) => ATT (I) | 0.86  |

|                 |      |      |      |                    |      |
|-----------------|------|------|------|--------------------|------|
|                 | 1529 | 510  | 529  | ACG (T) => ATG (M) | 0.86 |
|                 | 1933 | 645  | 829  | CCA (P) => TCA (S) | 1    |
|                 | 2314 | 772  | 960  | CGG (R) => TGG (W) | 1    |
|                 | 2993 | 998  | 1198 | ACT (T) => ATT (I) | 1    |
|                 | 3560 | 1187 | 1397 | ACT (T) => ATT (I) | 0.86 |
| rpoC1 (C = 0.8) | 41   | 14   | 14   | TCA (S) => TTA (L) | 1    |
|                 | 1447 | 483  | 500  | CGT (R) => TGT (C) | 1    |
| rpoB (C = 0.8)  | 338  | 113  | 113  | TCT (S) => TTT (F) | 1    |
|                 | 551  | 184  | 185  | TCA (S) => TTA (L) | 1    |
|                 | 566  | 189  | 190  | TCG (S) => TTG (L) | 1    |
|                 | 1450 | 484  | 501  | CCT (P) => TCT (S) | 1    |
|                 | 2000 | 667  | 684  | TCT (S) => TTT (F) | 1    |
|                 | 2426 | 809  | 827  | TCA (S) => TTA (L) | 0.86 |
| rpoA (C = 0.8)  | 833  | 278  | 280  | TCA (S) => TTA (L) | 1    |
| rps2 (C = 0.8)  | 676  | 226  | 226  | CGT (R) => TGT (C) | 0.86 |
| rps14 (C = 0.8) | 80   | 27   | 27   | TCA (S) => TTA (L) | 1    |
|                 | 149  | 50   | 53   | CCG (P) => CTG (L) | 1    |
