# Supplementary material for: Complete Chloroplast Genome of Cnidium monnieri (Apiaceae) and Comparisons with Other Tribe Selineae Species
Source: MDPI journal article supplement (doi:10.3390/d14050323), 2022-04-21
Supplement: s1 [file s1]

**Table S3.** Codon usage and relative synonymous codon usage (RSCU) value for protein-coding genes in the *C. monnieri* chloroplast genome.

| Codon  | Count | RSCU |
|--------|-------|------|--------|-------|------|--------|-------|------|--------|-------|------|
| UUU(F) | 927   | 1.34 | UCU(S) | 516   | 1.71 | UAU(Y) | 747   | 1.61 | UGU(C) | 196   | 1.52 |
| UUC(F) | 453   | 0.66 | UCC(S) | 281   | 0.93 | UAC(Y) | 182   | 0.39 | UGC(C) | 62    | 0.48 |
| UUA(L) | 839   | 1.95 | UCA(S) | 353   | 1.17 | UAA(*) | 46    | 1.62 | UGA(*) | 17    | 0.6  |
| UUG(L) | 495   | 1.15 | UCG(S) | 189   | 0.63 | UAG(*) | 22    | 0.78 | UGG(W) | 415   | 1    |
| CUU(L) | 537   | 1.25 | CCU(P) | 401   | 1.58 | CAU(H) | 428   | 1.51 | CGU(R) | 329   | 1.37 |
| CUC(L) | 187   | 0.44 | CCC(P) | 185   | 0.73 | CAC(H) | 139   | 0.49 | CGC(R) | 90    | 0.37 |
| CUA(L) | 358   | 0.83 | CCA(P) | 275   | 1.09 | CAA(Q) | 645   | 1.52 | CGA(R) | 334   | 1.39 |
| CUG(L) | 160   | 0.37 | CCG(P) | 151   | 0.6  | CAG(Q) | 204   | 0.48 | CGG(R) | 116   | 0.48 |
| AUU(I) | 996   | 1.45 | ACU(T) | 527   | 1.64 | AAU(N) | 851   | 1.51 | AGU(S) | 368   | 1.22 |
| AUC(I) | 392   | 0.57 | ACC(T) | 238   | 0.74 | AAC(N) | 279   | 0.49 | AGC(S) | 107   | 0.35 |
| AUA(I) | 677   | 0.98 | ACA(T) | 380   | 1.18 | AAA(K) | 981   | 1.51 | AGA(R) | 441   | 1.83 |
| AUG(M) | 572   | 1    | ACG(T) | 140   | 0.44 | AAG(K) | 316   | 0.49 | AGG(R) | 134   | 0.56 |
| GUU(V) | 510   | 1.5  | GCU(A) | 602   | 1.8  | GAU(D) | 754   | 1.6  | GGU(G) | 563   | 1.34 |
| GUC(V) | 163   | 0.48 | GCC(A) | 218   | 0.65 | GAC(D) | 190   | 0.4  | GGC(G) | 187   | 0.44 |
| GUA(V) | 500   | 1.47 | GCA(A) | 366   | 1.09 | GAA(E) | 935   | 1.51 | GGA(G) | 657   | 1.56 |
| GUG(V) | 190   | 0.56 | GCG(A) | 154   | 0.46 | GAG(E) | 305   | 0.49 | GGG(G) | 276   | 0.66 |

Average# codons= 24248.
